# Supplementary material for: Coil-to-α-helix transition at the Nup358-BicD2 interface activates BicD2 for dynein recruitment
Source: eLife. 2022 Mar 1;11:e74714. doi: 10.7554/eLife.74714 (PMC8956292; doi:10.7554/eLife.74714)
Supplement: Figure 2—source data 1. [file elife-74714-fig2-data1.xlsx]

## Sheet: Sheet1
	DDBNmin-zip (events/min/µm MT)	events/min//µm MT	events/min//µm MT			DDBCC1 (events/min/µm MT)	events/min//µm MT	events/min//µm MT			DDB (events/min/µm MT)	events/min//µm MT	events/min//µm MT			DDNmin-zi p(events/min/µm MT)	events/min//µm MT	events/min//µm MT
	0.071599	0.0884956	0.1111			0.155588	0.0841397	0.1559			0.0234383	0	0.0334			0.0306429	0.0476508	0.0603
	0.0845547	0.116618	0.0563			0.165262	0.0942152	0.1221			0.033173	0	0			0.0396794	0	0
	0.0509295	0.135135	0.0881			0.128661	0.169607	0.2455			0.0445269	0	0			0	0	0
	0.0747105	0.0505306	0.1026			0.238588	0.124397	0.1764			0	0.0581446	0.0642			0	0	0.0224
	0.0539084	0.103413	0.1303			0.159586	0.160388	0.1648			0.0526887	0.0322206	0			0	0	0
	0.0809061	0.065083	0.0846			0.13875	0.169233	0.1485			0.0614251	0.0435749	0			0	0	0
	0.0998502	0.0457666	0.0778			0.1844	0.125676	0.1807			0.0313098	0.0490942	0.0557			0	0	0
	0.0905797	0.0475285	0.0748			0.157319	0.198926	0.209			0.0384832	0.0348214	0			0	0	0
	0.0724638	0.0875657	0.1136			0.210735	0.198334	0.1237			0	0.0583601	0			0	0	0
	0.0847458	0.0286615	0.0778			0.103794	0.121014	0.2053			0	0	0			0	0	0
	0.127226	0.0559754	0.2312			0.258598	0.0975419	0.1648			0	0	0.0413			0	0	0
	0.098668	0.0344353	0.1412			0.141123	0.23511	0.1337			0	0	0			0	0.0388048	0
	0.0839983	0.0295596	0.1446			0.118196	0.200361	0.114			0	0	0			0	0	0.0441
	0.0994036	0.0436586	0.0751			0.182127	0.159867	0.1388			0	0	0.0329			0	0	0
	0.0698812	0.0278474	0.0816			0.199949	0.0908843	0.1316			0	0	0			0.0321038	0	0
	0.0606428	0.0616523	0.0614			0.180515	0.122986	0.2339			0.0534528	0.0416164	0			0	0	0
	0.0773994	0.0498008	0.0437			0.175469	0.0580282	0.325			0	0	0			0	0	0
	0.0703235	0.0533618	0.0803				0.159141	0.2899			0	0	0.0355			0	0	0
	0.068918	0.0475511	0.1208				0.111532	0.2158			0	0.0283575	0			0		0.0266
	0.0905387	0.0402901	0.0839					0.2331			0	0	0			0		0
	0.0765404	0.0897666	0.107					0.1121			0.0406343	0.0649266	0					0
	0.114416	0.0576701	0.1497					0.1575			0	0	0					0
	0.140056		0.0458					0.1374			0.0278815		0					0
			0.0971					0.1018					0					0
			0.0313					0.1294					0					0
			0.0779					0.2427					0					0
			0.0917					0.1397					0					0
			0.0843					0.1487					0.0396					0
			0.0842					0.1209					0					0
			0.1223					0.12					0					0
			0.0823					0.1992										0
			0.0727					0.3817										0
Mean	0.0844461	0.0618348	0.0946			0.1782	0.170509	0.141125			0.0101	0.0176962	0.0186871			0.0047906	0.0051213	0.00480309
