# Supplementary material for: Coil-to-α-helix transition at the Nup358-BicD2 interface activates BicD2 for dynein recruitment
Source: eLife. 2022 Mar 1;11:e74714. doi: 10.7554/eLife.74714 (PMC8956292; doi:10.7554/eLife.74714)
Supplement: Figure 2—source data 2. [file elife-74714-fig2-data2.xlsx]

## Sheet: Sheet1
DDBNmin-zip (µm/s)	DDBCC1 (µm/s)
0.3305	0.174061
0.4328	0.101275
0.484	0.195037
0.256	1.2252
0.2371	1.62033
0.5401	1.07088
0.1591	0.618916
0.2128	0.323354
0.1218	0.099415
0.1153	0.5746
0.4859	0.382939
0.4114	0.703701
0.7087	0.281462
0.1396	0.261522
0.9619	0.185107
0.427	0.337495
0.147	0.842579
0.3603	0.614015
0.3552	0.507829
0.1448	0.715322
0.0809	0.147912
0.1131	0.088933
0.0638	0.795886
0.3274	0.665926
0.0508	0.442366
0.3868	0.701745
0.3872	0.47502
0.1713	0.93136
0.4237	0.93778
0.2929	0.505675
0.1042	0.250058
0.11	0.764246
0.1233	0.143158
0.3059	0.380295
0.5276	0.397483
0.153	0.492034
0.131	0.598767
0.1979	0.61499
0.0826	0.533201
0.5446	0.591862
0.0768	0.404974
0.5335	0.476113
0.4216	0.202801
0.1773	0.266006
0.1818	0.618977
0.148	0.245937
0.4095	0.45483
0.2431	0.922227
0.3199	0.194225
0.1441	0.691147
0.3582	0.488531
0.5148	0.379179
0.3983	0.570963
0.4925	0.220241
0.3033	0.826901
0.295	0.374502
0.0803	0.245409
0.377	1.15354
0.3716	0.469904
0.1897	1.00445
0.2446	0.431974
0.5499	0.487559
0.351	0.788901
0.426	0.369444
0.1203	0.473145
0.8476	0.388292
0.4185	0.929288
0.231	0.656042
0.6798	0.718809
0.2091	0.345374
0.501	0.393909
0.824	0.232165
0.6159	0.445101
0.372	0.235643
0.2587	0.217863
0.351	0.287827
0.5695	0.103697
0.315	0.230908
0.592	0.305746
0.689	0.075548
0.309	0.483
0.661	0.783
0.754	0.985
1.285	0.877
0.642	0.743
0.377	0.597
0.638	0.38
0.576	0.897
0.454	0.531
0.598	0.532
0.696	0.526
0.526	0.443
0.351	0.372
0.742	0.523
0.959	0.695
0.55	0.656
1.148	0.601
0.261	0.589
0.601	0.697
0.84	0.789
0.16	0.361
0.827	0.332
0.661	0.548
0.694	0.39
0.392	0.557
0.769	0.648
0.276	0.501
0.826	0.699
0.611	0.476
0.353	0.63
0.482	0.783
0.477	0.182
0.478	0.546
0.886	0.299
0.235	0.444
0.333	0.786
0.216	0.268
0.595	0.381
1.3038	0.432
0.115	0.641
0.47	0.438
0.127	0.393
0.245	0.479
	0.494
	0.592
	0.278
	0.125
	0.246
	0.716
	0.863
	0.844
	0.606
	1.263
	0.948
	0.41
	0.744
	1.348
