# Supplementary material for: Coil-to-α-helix transition at the Nup358-BicD2 interface activates BicD2 for dynein recruitment
Source: eLife. 2022 Mar 1;11:e74714. doi: 10.7554/eLife.74714 (PMC8956292; doi:10.7554/eLife.74714)
Supplement: Figure 2—source data 3. [file elife-74714-fig2-data3.xlsx]

## Sheet: Sheet1
DDBN-WT (µm)	DDBCC1(µm)
4.97866	5.7788
3.88886	6.3218
3.1498	5.5355
1.61741	11.9431
2.70503	6.126
1.36004	4.861
4.06898	5.3544
1.06974	4.8275
4.99219	7.6958
2.79276	2.6047
1.15424	8.7339
3.84299	7.1993
5.20351	4.2222
5.80111	7.6325
6.17984	9.5814
1.21669	6.0358
1.89255	5.025
2.46479	8.4258
2.00406	3.5613
4.06022	5.48455
0.924595	5.2934
1.16042	3.5499
2.32307	0.9427
3.8019	4.457
1.271	3.3296
1.05436	5.9277
1.77156	4.8245
8.13721	3.5201
1.87403	3.9117
2.50867	1.3129
1.16069	1.9216
2.47938	9.2004
1.57201	6.7254
2.01854	2.8918
1.1724	3.1184
2.72299	5.9079
1.76669	2.1649
2.66748	2.6346
1.93915	2.337
2.72977	2.1328
1.12726	3.7879
2.63446	2.2679
5.65053	1.8092
2.23685	1.064
2.94325	4.7042
4.4997	1.9183
1.14615	4.7302
1.1325	1.4756
2.23049	2.9134
2.95492	1.9352
1.85594	2.6381
1.23904	1.7442
1.80492	7.99348
1.80184	1.806
0.743263	7.2767
0.682945	8.0486
1.95671	1.6688
1.09975	3.2299
2.03092	3.7592
1.82834	6.0267
5.34162	8.8123
9.61073	3.3154
5.12764	2.5245
8.86758	3.6206
2.98182	1.9872
3.93225	4.4755
3.53078	2.602
5.10841	3.4114
9.73	11.9409
2.007	4.6971
4.989	5.0291
1.863	3.3432
2.988	7.1081
2.529	4.2622
5.785	6.8845
6.366	6.9079
2.854	2.8031
5.328	3.8793
6.275	4.7696
14.877	5.5837
10.004	12.552
19.294	9.401
6.784	19.449
10.285	3.508
14.788	17.297
8.894	10.633
12.891	2.886
2.763	19.209
4.362	11.993
11.716	14.228
6.401	21.383
5.574	7.707
3.231	13.59
6.528	8.165
12.85	12.224
9.343	16.003
6.429	5.653
4.962	6.484
8.607	12.678
6.382	7.26
1.729	9.16
5.953	5.719
5.681	5.04
10.269	6.08
5.567	5.014
4.305	4.797
2.814	8.204
3.138	4.054
9.168	7.519
3.675	6.555
3.854	7.202
17.94	4.596
16.686	12.331
6.834	8.144
2.304	7.908
3.859	8.336
2.33	11.819
1.547	4.272
5.476	7.697
2.95	2.947
3.851	6.801
1.757	4.167
2.45	3.161
	3.063
	8.387
	3.33
	2.459
	6.156
	6.585
	10.88
	9.451
	3.392
	4.548
	7.582
	2.953
	6.548
	3.236
