# Supplementary material for: Coil-to-α-helix transition at the Nup358-BicD2 interface activates BicD2 for dynein recruitment
Source: eLife. 2022 Mar 1;11:e74714. doi: 10.7554/eLife.74714 (PMC8956292; doi:10.7554/eLife.74714)
Supplement: Figure 3—source data 1. [file elife-74714-fig3-data1.xlsx]

## Sheet: Sheet1
Assignment	Residue #	Bound Average	Error						Residue #	Bound Average	Error		Residue #	Bound Average	Error			Residue #	Bound Average	Error		Residue #	Bound Average	Error				New Residue	Pt1/Apo	Uncertainty	Pt/3Apo	Uncertainty
L3	2145	0.673664	0.0131742						2210	1.01473	0.00911381		2158	0.640581	0.0388667			8				2222	0.742219	0.0176852				2148	0.931935	0.0429319	0.905855	0.025077
G4	2146	0.830341	0.0196874						2209	0.985853	0.0085336		2190	0.640224	0.027435			12				2225	0.871166	0.0183985				2149	0.964015	0.0172282	0.826222	0.010806
S5	2147	0.646449	0.00852303						2240	0.980132	0.0298251		2182	0.610114	0.0266075			13										2151	0.936356	0.0119528	0.688273	0.0081955
D6	2148	0.804865	0.029745						2211	0.977503	0.0257121		2151	0.581314	0.0115951			14										2152	0.895112	0.0338413	0.786877	0.0210221
I7	2149	0.657846	0.0238115						2203	0.961284	0.00938987		2188	0.57666	0.0249791			26										2153	0.882503	0.0495395	0.765295	0.0309701
	2150								2204	0.92472	0.0416947		2161	0.570143	0.00839947			31										2155	0.937478	0.129165	0.710456	0.0855228
L9	2151	0.581314	0.0115951						2233	0.920367	0.0374467		2152	0.550575	0.0199051			32										2156	0.957045	0.0782818	0.771633	0.0506181
Q10	2152	0.550575	0.0199051						2237	0.917516	0.0174468		2157	0.536357	0.033282			35										2157	0.873038	0.0136718	0.713492	0.00878714
T11	2153	0.472377	0.0229954						2193	0.916311	0.0324724		2189	0.499538	0.00748962			36										2158	0.906557	0.015888	0.733643	0.0102582
	2154								2198	0.913738	0.0166451		2172	0.485708	0.020549			37										2159	0.934274	0.0371976	0.736604	0.0241195
	2155								2216	0.911982	0.0282078		2171	0.476377	0.0505256			38										2160	0.82546	0.0829754	0.595409	0.0569789
	2156								2234	0.900451	0.0512463		2181	0.47453	0.0374636			45										2161	0.933266	0.0568608	0.685943	0.039208
L15	2157	0.536357	0.033282						2239	0.881911	0.0218275		2153	0.472377	0.0229954			49										2162	0.930822	0.0643607	0.72126	0.0419819
V16	2158	0.640581	0.0388667						2232	0.881117	0.014993		2186	0.464023	0.0718683			54										2163	0.873016	0.0367258	0.653997	0.0246865
D17	2159	0.460847	0.0293487						2142				2159	0.460847	0.0293487			57										2164	0.880093	0.0226517	0.617955	0.0161795
T18	2160	0.443031	0.0177815						2238	0.856469	0.0135419		2162	0.447166	0.0247057			60										2165	0.829083	0.0250559	0.664171	0.0163154
G19	2161	0.570143	0.00839947						2205	0.855496	0.0342799		2160	0.443031	0.0177815			66										2166	0.855251	0.0187399	0.691017	0.0122537
R20	2162	0.447166	0.0247057						2195	0.855182	0.00500483		2170	0.422565	0.0374224			71										2167	0.885946	0.01397	0.69764	0.00917643
A21	2163	0.335275	0.0306133						2212	0.854244	0.0307545		2166	0.418827	0.0260253			73										2169	0.854236	0.0319696	0.659876	0.0212805
A22	2164	0.407485	0.0522968						2231	0.852442	0.0371276		2183	0.416204	0.0323566			78										2170	0.848123	0.0324232	0.580749	0.0232463
K23	2165	0.373057	0.0180427						2206	0.846516	0.0105979		2185	0.410202	0.00459895			81										2171	0.910625	0.0172128	0.616963	0.0124382
L24	2166	0.418827	0.0260253						2228	0.84572	0.0717702		2164	0.407485	0.0522968			82										2172	0.879061	0.0147958	0.736465	0.00943731
I25	2167	0.405072	0.0400036						2235	0.84572	0.0717702		2167	0.405072	0.0400036			85										2173	0.849593	0.0246612	0.690892	0.0159518
	2168								2219	0.842662	0.0333158		2184	0.395322	0.0249778			88										2175	0.759735	0.175974	0.534042	0.127837
R27	2169	0.394758	0.0415701						2217	0.837442	0.0261827		2169	0.394758	0.0415701			94										2176	0.617791	0.161779	0.586497	0.0991561
A28	2170	0.422565	0.0374224						2146	0.830341	0.0196874		2165	0.373057	0.0180427													2181	0.893415	0.0266678	0.691857	0.017809
E29	2171	0.476377	0.0505256						2197	0.82354	0.131125		2175	0.339062	0.0529125													2182	0.871443	0.0359893	0.715191	0.0234958
E30	2172	0.485708	0.020549						2214	0.814854	0.0232864		2163	0.335275	0.0306133													2183	0.864843	0.0296007	0.722753	0.0189313
	2173								2226	0.810304	0.0178142		2173	0.403255	0.020714													2184	0.827695	0.0217583	0.636414	0.0146108
	2174								2201	0.808479	0.0327406		2176	0.305959	0.0471901													2185	0.846928	0.0297892	0.583391	0.0213972
S33	2175	0.339062	0.0529125						2148	0.804865	0.029745																	2186	0.675115	0.186124	0.70949	0.106843
G34	2176	0.305959	0.0471901						2194	0.79096	0.00392027																	2187	0.925113	0.0385023	0.745762	0.0253009
	2177								2200	0.781307	0.0754342																	2188	0.943626	0.0242953	0.851292	0.0148103
	2178								2218	0.753482	0.0281524																	2189	0.941175	0.0285467	0.695977	0.019494
	2179								2142																			2190	0.920735	0.0192073	0.754979	0.012359
	2180								2207	0.718811	0.0511882																	2192	0.919655	0.0172942	0.77961	0.0109852
K39	2181	0.47453	0.0374636						2192	0.716383	0.0195792																	2193	0.953582	0.0166973	0.777054	0.0107051
T40	2182	0.610114	0.0266075						2229	0.71492	0.0347664																	2194	0.882073	0.0123821	0.705343	0.0080822
F41	2183	0.416204	0.0323566						2221	0.699225	0.0134596								2190	48	K48							2195	0.926035	0.0133752	0.776076	0.00849797
L42	2184	0.395322	0.0249778						2145	0.673664	0.0131742								2151	9	L9							2196	0.901024	0.037275	0.81889	0.0227361
T43	2185	0.410202	0.00459895						2149	0.657846	0.0238115																	2197	0.992177	0.104851	0.730275	0.0720948
N44	2186	0.464023	0.0718683						2196	0.952187	0.0653604																	2198	0.998341	0.0624482	0.893559	0.0378712
	2187																											2200	0.932431	0.107357	0.824199	0.0675629
Q46	2188	0.57666	0.0249791																									2201	0.887549	0.0820673	0.801357	0.0500377
T47	2189	0.499538	0.00748962																									2202	0.802708	0.128765	0.910459	0.0682307
K48	2190	0.640224	0.027435																									2203	0.960712	0.0257988	0.952168	0.014902
	2191																											2204	0.934071	0.0254483	0.926804	0.0148216
T50	2192	0.716383	0.0195792																									2205	0.929642	0.0419487	0.90758	0.0247738
E51	2193	0.916311	0.0324724																									2206	0.834918	0.0390408	0.850234	0.022292
E52	2194	0.79096	0.00392027																									2207	0.906059	0.095303	0.982606	0.0521738
E53	2195	0.855182	0.00500483																									2208	0.913156	0.0415903	0.869914	0.0246041
	2196																											2209	0.907256	0.0307622	0.91983	0.017453
K55	2197	0.82354	0.131125																									2210	0.943805	0.0341018	0.963053	0.0194362
G56	2198	0.913738	0.0166451																									2211	0.968907	0.0150298	0.973239	0.00865456
	2199																											2212	0.940639	0.0143751	0.911215	0.00841945
G58	2200	0.781307	0.0754342																									2214	0.90002	0.0358494	0.939961	0.0202079
T59	2201	0.808479	0.0327406																									2216	1	0.0152672	1	0.00877193
	2202																											2217	0.855091	0.0421611	0.835338	0.0248019
A61	2203	0.961284	0.00938987																									2218	0.957125	0.0543646	0.99045	0.0306223
A62	2204	0.92472	0.0416947																									2219	0.993267	0.0199327	0.901428	0.012111
G63	2205	0.855496	0.0342799																									2221	0.997592	0.0197781	0.958595	0.0116583
A64	2206	0.846516	0.0105979																									2222	0.966048	0.0161152	0.927371	0.0094479
S65	2207	0.718811	0.0511882																									2225	0.965923	0.00973229	0.90203	0.00581661
	2208																											2228	0.966404	0.0108641	0.917487	0.00645618
T67	2209	0.985853	0.0085336																									2229	0.905392	0.0104692	0.836265	0.00631019
T68	2210	1.01473	0.00911381																									2231	0.947487	0.0142152	0.851279	0.00869145
I69	2211	0.977503	0.0257121																									2232	0.99065	0.0111834	0.914533	0.00671766
K70	2212	0.854244	0.0307545																									2233	1.0089	0.00947592	0.857066	0.00595214
	2213																											2234	0.984345	0.00940448	0.900262	0.00568941
N72	2214	0.814854	0.0232864																									2235	0.966404	0.0108641	0.917487	0.00645618
	2215																											2237	0.956026	0.0126195	0.964163	0.00724783
E74	2216	0.911982	0.0282078																									2238	0.920658	0.0110383	0.872698	0.00657087
N75	2217	0.837442	0.0261827																									2239	0.92763	0.0235077	0.848839	0.0142218
T76	2218	0.753482	0.0281524																									2240	0.976449	0.00833945	0.842747	0.00519084
G77	2219	0.842662	0.0333158
	2220
T79	2221	0.699225	0.0134596
L80	2222	0.742219	0.0176852
	2223
	2224
D83	2225	0.871166	0.0183985
N84	2226	0.810304	0.0178142
	2227
D86	2228	0.84572	0.0717702
L87	2229	0.71492	0.0347664
	2230
E89	2231	0.852442	0.0371276
D90	2232	0.881117	0.014993
A91	2233	0.920367	0.0374467
L92	2234	0.900451	0.0512463
D93	2235	0.84572	0.0717702
	2236
S95	2237	0.917516	0.0174468
V96	2238	0.856469	0.0135419
S97	2239	0.881911	0.0218275
S98	2240	0.980132	0.0298251

## Sheet: Sheet2
Assignment	December6NupBicD2FilesApo/0	December6NupBicD2FilesBound1/1	December6NupBicD2FilesBound2/2	December6NupBicD2FilesBound3/3		1/Apo	2/Apo	3/Apo		Residue #	Bound Average	Error	Bound Average	Error
M31N-H	16000000000	52690000000	52900000000	46760000000		9.87937	9.91875	8.7675		2196	9.52187	0.653604	0.952187	0.0653604
N54N-H	30110000000	42020000000	41290000000	38110000000		4.18665	4.11392	3.79708		2173	4.03255	0.20714	0.403255	0.020714
