# Supplementary material for: Coil-to-α-helix transition at the Nup358-BicD2 interface activates BicD2 for dynein recruitment
Source: eLife. 2022 Mar 1;11:e74714. doi: 10.7554/eLife.74714 (PMC8956292; doi:10.7554/eLife.74714)
Supplement: Figure 4—source data 1. [file elife-74714-fig4-data1.xlsx]

## Sheet: Figure4a
ppm	intensity	error	fit ppm	fit intensity
118	0.670876	0.0335438	117.688	0.68895
118.25	0.66813	0.0334065	117.776	0.688753
118.5	0.681861	0.0340931	117.864	0.688544
118.75	0.689316	0.0344658	117.952	0.688321
119	0.676957	0.0338479	118.04	0.688083
119.25	0.688335	0.0344167	118.128	0.687829
119.5	0.698143	0.0349071	118.216	0.687557
119.75	0.684608	0.0342304	118.304	0.687266
120	0.669503	0.0334752	118.392	0.686953
120.25	0.679311	0.0339656	118.48	0.686617
120.5	0.683823	0.0341912	118.568	0.686255
120.75	0.677742	0.0338871	118.656	0.685864
121	0.629682	0.0314841	118.744	0.685442
121.25	0.539938	0.0269969	118.832	0.684984
121.5	0.384479	0.0192239	118.92	0.684487
121.75	0.144376	0.00721879	119.008	0.683946
122	0.097689	0.00488445	119.096	0.683355
122.25	0.125838	0.00629192	119.184	0.68271
122.5	0.4345	0.021725	119.272	0.682001
122.75	0.570049	0.0285024	119.36	0.681222
123	0.617128	0.0308564	119.448	0.680363
123.25	0.648906	0.0324453	119.536	0.679411
123.5	0.665188	0.0332594	119.624	0.678354
123.75	0.650279	0.032514	119.712	0.677176
124	0.675977	0.0337988	119.8	0.675856
124.25	0.667934	0.0333967	119.888	0.674372
124.5	0.669896	0.0334948	119.976	0.672696
124.75	0.675584	0.0337792	120.064	0.670793
125	0.69422	0.034711	120.152	0.668621
125.25	0.680292	0.0340146	120.24	0.666126
125.5	0.691866	0.0345933	120.328	0.663243
125.75	0.689904	0.0344952	120.416	0.659887
			120.504	0.65595
			120.592	0.651293
			120.68	0.645731
			120.768	0.639019
			120.856	0.630825
			120.944	0.620692
			121.032	0.607978
			121.12	0.591767
			121.208	0.570729
			121.296	0.542894
			121.384	0.505325
			121.472	0.453679
			121.56	0.381936
			121.648	0.283715
			121.736	0.160547
			121.824	0.0464253
			121.912	0.00235885
			122	7.71e-07
			122.088	0.00139216
			122.176	0.0371324
			122.264	0.14584
			122.352	0.270639
			122.44	0.372119
			122.528	0.446604
			122.616	0.500218
			122.704	0.53915
			122.792	0.567929
			122.88	0.589631
			122.968	0.606318
			123.056	0.61938
			123.144	0.629772
			123.232	0.638162
			123.32	0.645025
			123.408	0.650705
			123.496	0.655456
			123.584	0.659467
			123.672	0.662884
			123.76	0.665817
			123.848	0.668352
			123.936	0.670559
			124.024	0.67249
			124.112	0.674191
			124.2	0.675695
			124.288	0.677032
			124.376	0.678226
			124.464	0.679296
			124.552	0.680259
			124.64	0.681128
			124.728	0.681916
			124.816	0.682632
			124.904	0.683284
			124.992	0.68388
			125.08	0.684427
			125.168	0.684929
			125.256	0.685391
			125.344	0.685817
			125.432	0.686212
			125.52	0.686577
			125.608	0.686916
			125.696	0.687231
			125.784	0.687525
			125.872	0.687799
			125.96	0.688055
			126.048	0.688294
			126.136	0.688519
			126.224	0.68873

## Sheet: Figure4b
ppm	intensity	error	fit ppm	fit intensity
167.6	0.483688	0.0241844	166.932	0.483986
167.92	0.484498	0.0242249	167.064	0.483963
168.3	0.484904	0.0242452	167.196	0.483939
168.56	0.483283	0.0241641	167.328	0.483913
168.88	0.479433	0.0239716	167.46	0.483886
169.2	0.483891	0.0241945	167.592	0.483856
169.52	0.492806	0.0246403	167.724	0.483824
169.84	0.476596	0.0238298	167.856	0.483789
170.16	0.477406	0.0238703	167.988	0.483752
170.48	0.486322	0.0243161	168.12	0.483712
170.64	0.48227	0.0241135	168.252	0.483669
170.96	0.485917	0.0242958	168.384	0.483622
171.28	0.480243	0.0240122	168.516	0.48357
171.6	0.487335	0.0243668	168.648	0.483514
171.92	0.469909	0.0234954	168.78	0.483453
172.24	0.458561	0.0229281	168.912	0.483386
172.56	0.416413	0.0208207	169.044	0.483312
172.88	0.192239	0.00961196	169.176	0.483231
173.2	0.150375	0.00751874	169.308	0.48314
173.68	0.428571	0.0214286	169.44	0.48304
174	0.462006	0.0231003	169.572	0.482929
174.32	0.468896	0.0234448	169.704	0.482804
174.64	0.476596	0.0238298	169.836	0.482663
174.96	0.484296	0.0242148	169.968	0.482505
175.28	0.479027	0.0239514	170.1	0.482325
175.6	0.480446	0.0240223	170.232	0.482119
175.9	0.487133	0.0243566	170.364	0.481883
176.24	0.477001	0.0238501	170.496	0.481609
176.56	0.477204	0.0238602	170.628	0.481291
176.72	0.485309	0.0242655	170.76	0.480917
177.04	0.482675	0.0241337	170.892	0.480474
177.36	0.483688	0.0241844	171.024	0.479943
177.68	0.477204	0.0238602	171.156	0.4793
178	0.480446	0.0240223	171.288	0.478511
178.32	0.487133	0.0243566	171.42	0.477529
178.64	0.488956	0.0244478	171.552	0.476285
178.96	0.489564	0.0244782	171.684	0.474678
179.28	0.481864	0.0240932	171.816	0.472553
			171.948	0.469663
			172.08	0.465596
			172.212	0.459627
			172.344	0.450393
			172.476	0.435102
			172.608	0.407459
			172.74	0.351777
			172.872	0.230072
			173.004	0.0380969
			173.136	0.0319754
			173.268	0.222439
			173.4	0.34823
			173.532	0.405786
			173.664	0.434221
			173.796	0.449881
			173.928	0.459306
			174.06	0.465382
			174.192	0.469514
			174.324	0.472445
			174.456	0.474598
			174.588	0.476224
			174.72	0.477481
			174.852	0.478473
			174.984	0.479269
			175.116	0.479917
			175.248	0.480452
			175.38	0.480899
			175.512	0.481276
			175.644	0.481596
			175.776	0.481872
			175.908	0.482109
			176.04	0.482316
			176.172	0.482497
			176.304	0.482657
			176.436	0.482798
			176.568	0.482924
			176.7	0.483036
			176.832	0.483136
			176.964	0.483227
			177.096	0.483309
			177.228	0.483383
			177.36	0.48345
			177.492	0.483512
			177.624	0.483568
			177.756	0.483619
			177.888	0.483667
			178.02	0.48371
			178.152	0.483751
			178.284	0.483788
			178.416	0.483822
			178.548	0.483855
			178.68	0.483884
			178.812	0.483912
			178.944	0.483938
			179.076	0.483962
			179.208	0.483985
			179.34	0.484006
			179.472	0.484026
			179.604	0.484045
			179.736	0.484063

## Sheet: Figure4c
ppm	intensity	error	fit ppm	fit intensity
118	0.285763	0.0285763	117.98	0.256546
118.25	0.244836	0.0244836	118.06	0.254139
118.5	0.219351	0.0219351	118.14	0.251404
118.75	0.197976	0.0197976	118.22	0.248288
119	0.193436	0.0193436	118.3	0.244735
119.25	0.170139	0.0170139	118.38	0.240682
119.5	0.171929	0.0171929	118.46	0.236064
119.75	0.200097	0.0200097	118.54	0.230822
120	0.215772	0.0215772	118.62	0.224911
120.25	0.212856	0.0212856	118.7	0.218314
120.5	0.23559	0.023559	118.78	0.211072
120.75	0.267901	0.0267901	118.86	0.20331
121	0.239103	0.0239103	118.94	0.195274
121.25	0.208863	0.0208863	119.02	0.187352
121.5	0.251033	0.0251033	119.1	0.180069
121.75	0.216236	0.0216236	119.18	0.174032
122	0.208697	0.0208697	119.26	0.169824
122.25	0.116188	0.0116188	119.34	0.167865
122.5	0.0213419	0.0021342	119.42	0.168296
122.75	0.00222268	0.000222268	119.5	0.17095
123	0.00616398	0.000616398	119.58	0.175401
123.25	0.0499083	0.00499083	119.66	0.181089
123.5	0.16835	0.016835	119.74	0.187446
123.75	0.233999	0.0233999	119.82	0.193984
124	0.239666	0.0239666	119.9	0.200341
124.25	0.249741	0.0249741	119.98	0.206281
124.5	0.260412	0.0260412	120.06	0.211673
124.75	0.272839	0.0272839	120.14	0.216459
125	0.260378	0.0260378	120.22	0.220631
125.25	0.253286	0.0253286	120.3	0.224211
125.5	0.297329	0.0297329	120.38	0.227233
125.75	0.27211	0.027211	120.46	0.229738
			120.54	0.231766
			120.62	0.23335
			120.7	0.234521
			120.78	0.235301
			120.86	0.235705
			120.94	0.23574
			121.02	0.235406
			121.1	0.234692
			121.18	0.23358
			121.26	0.232042
			121.34	0.230035
			121.42	0.227504
			121.5	0.224374
			121.58	0.220553
			121.66	0.215917
			121.74	0.21031
			121.82	0.203536
			121.9	0.195344
			121.98	0.18542
			122.06	0.173377
			122.14	0.158759
			122.22	0.14107
			122.3	0.119874
			122.38	0.0950576
			122.46	0.0673793
			122.54	0.0393922
			122.62	0.0161388
			122.7	0.00312234
			122.78	1.58694e-05
			122.86	0.000430882
			122.94	0.00123998
			123.02	0.00369487
			123.1	0.0115319
			123.18	0.0285407
			123.26	0.0538003
			123.34	0.0826083
			123.42	0.110674
			123.5	0.135738
			123.58	0.157126
			123.66	0.174983
			123.74	0.189764
			123.82	0.201981
			123.9	0.212109
			123.98	0.220546
			124.06	0.227617
			124.14	0.233583
			124.22	0.238649
			124.3	0.24298
			124.38	0.246706
			124.46	0.249931
			124.54	0.252739
			124.62	0.255196
			124.7	0.257357
			124.78	0.259267
			124.86	0.260964
			124.94	0.262476
			125.02	0.263831
			125.1	0.265048
			125.18	0.266145
			125.26	0.267138
			125.34	0.268039
			125.42	0.26886
			125.5	0.269609
			125.58	0.270295
			125.66	0.270924
			125.74	0.271503

## Sheet: Figure4d
ppm	intensity	error	fitppm	fitintensity
167.6	0.47	0.0237056	166.932	0.471765
167.92	0.47	0.0236011	167.064	0.471745
168.3	0.47	0.0235315	167.196	0.471724
168.56	0.46	0.0232412	167.328	0.471702
168.88	0.48	0.0238797	167.46	0.471679
169.2	0.48	0.0238101	167.592	0.471655
169.52	0.47	0.0235779	167.724	0.471629
169.84	0.48	0.024019	167.856	0.471602
170.16	0.48	0.0237985	167.988	0.471573
170.48	0.47	0.0235431	168.12	0.471543
170.64	0.47	0.0234618	168.252	0.47151
170.96	0.48	0.0238449	168.384	0.471476
171.28	0.48	0.0239146	168.516	0.47144
171.6	0.47	0.0235779	168.648	0.471401
171.92	0.47	0.0232645	168.78	0.47136
172.24	0.47	0.023694	168.912	0.471317
172.56	0.47	0.0234734	169.044	0.47127
172.88	0.45	0.022417	169.176	0.47122
173.2	0.44	0.0219062	169.308	0.471166
173.68	0.46	0.0230671	169.44	0.471109
174	0.44	0.0218946	169.572	0.471047
174.32	0.38	0.0190852	169.704	0.470981
174.64	0.17	0.00831669	169.836	0.470909
174.96	0.12	0.00578012	169.968	0.470832
175.28	0.3	0.0150685	170.1	0.470748
175.6	0.4	0.0200255	170.232	0.470657
176.24	0.44	0.0218133	170.364	0.470558
176.56	0.43	0.0216508	170.496	0.47045
176.72	0.43	0.0213838	170.628	0.470332
177.04	0.4	0.0197934	170.76	0.470203
177.36	0.38	0.018795	170.892	0.47006
177.68	0.4	0.0201765	171.024	0.469903
178	0.45	0.0224634	171.156	0.469729
178.32	0.46	0.0230671	171.288	0.469535
178.64	0.47	0.0234502	171.42	0.469319
178.96	0.47	0.0233341	171.552	0.469077
179.28	0.47	0.0237404	171.684	0.468804
			171.816	0.468495
			171.948	0.468143
			172.08	0.467741
			172.212	0.467276
			172.344	0.466738
			172.476	0.466107
			172.608	0.465362
			172.74	0.464474
			172.872	0.463404
			173.004	0.462097
			173.136	0.460478
			173.268	0.458441
			173.4	0.455827
			173.532	0.452399
			173.664	0.447785
			173.796	0.441377
			173.928	0.432137
			174.06	0.418184
			174.192	0.395896
			174.324	0.357848
			174.456	0.288564
			174.588	0.164214
			174.72	0.0277433
			174.852	0.000434942
			174.984	0.0626936
			175.116	0.21809
			175.248	0.316411
			175.38	0.369162
			175.512	0.398825
			175.644	0.416595
			175.776	0.427771
			175.908	0.434985
			176.04	0.439615
			176.172	0.442391
			176.304	0.443673
			176.436	0.443567
			176.568	0.441951
			176.7	0.43844
			176.832	0.432288
			176.964	0.422282
			177.096	0.407007
			177.228	0.386991
			177.36	0.370629
			177.492	0.373109
			177.624	0.39351
			177.756	0.415923
			177.888	0.432561
			178.02	0.443599
			178.152	0.450844
			178.284	0.455712
			178.416	0.459093
			178.548	0.46152
			178.68	0.463314
			178.812	0.464678
			178.944	0.465738
			179.076	0.46658
			179.208	0.467261
			179.34	0.467819
			179.472	0.468284
			179.604	0.468676
			179.736	0.46901
