# Supplementary material for: Coil-to-α-helix transition at the Nup358-BicD2 interface activates BicD2 for dynein recruitment
Source: eLife. 2022 Mar 1;11:e74714. doi: 10.7554/eLife.74714 (PMC8956292; doi:10.7554/eLife.74714)
Supplement: Figure 5—source data 1. [file elife-74714-fig5-data1.xlsx]

## Sheet: Figure5
TITLE	Nup358_2148_2240_dot3mgml					TITLE	Nup358_2148_2240_dot3mgml-1				TITLE	BicD2_715_804_dot3mgml-1					TITLE	BicD2_715_804_dot3mgml-2				TITLE	BicD2_715_804_dot3mgml-3				BicD2+Nup358	BicD2+Nup358		TITLE	BicD2_715_804_Nup358_2148_2240_dot6mgml-1					TITLE	BicD2_715_804_Nup358_2147_2240_dot6mgml					TITLE	BicD2_715_804_Nup358_2147_2240_dot6mgml-1				Bar graph
DATA TYPE						DATA TYPE					DATA TYPE						DATA TYPE					DATA TYPE								DATA TYPE						DATA TYPE						DATA TYPE
ORIGIN	JASCO			PATH	0.1	ORIGIN	JASCO				ORIGIN	JASCO			PATH	0.1	ORIGIN	JASCO				ORIGIN	JASCO							ORIGIN	JASCO					ORIGIN	JASCO					ORIGIN	JASCO					Raw	Molar ellipticity
OWNER				SIZE (Da)	10534	OWNER					OWNER				SIZE (Da)	10923	OWNER					OWNER								OWNER						OWNER						OWNER					BicD2 at 222nm	-100.687	-39419.5
DATE	20/01/20			PEPTIDES	97	DATE	20/01/20				DATE	20/01/20			PEPTIDES	93	DATE	20/01/20				DATE	20/01/20							DATE	20/01/20					DATE	20/01/20					DATE	20/01/20				Nup358 at 222nm	-10.6938	-3871.08
TIME	19:01:34			CONCENTRATION	0.3	TIME	18:46:53				TIME	19:16:25			CONCENTRATION	0.3	TIME	19:30:27				TIME	19:45:29							TIME	20:00:25					TIME	20:16:32					TIME	20:00:25				BicD2/Nup358 at 222nm	-123.829	-48479.7
SPECTROMETER/DATA SYSTEM						SPECTROMETER/DATA SYSTEM					SPECTROMETER/DATA SYSTEM						SPECTROMETER/DATA SYSTEM					SPECTROMETER/DATA SYSTEM								SPECTROMETER/DATA SYSTEM						SPECTROMETER/DATA SYSTEM						SPECTROMETER/DATA SYSTEM					BicD2+Nup358 at 222nm	-111.381	-43606.2
LOCALE	1033					LOCALE	1033				LOCALE	1033					LOCALE	1033				LOCALE	1033							LOCALE	1033					LOCALE	1033					LOCALE	1033
RESOLUTION						RESOLUTION					RESOLUTION						RESOLUTION					RESOLUTION								RESOLUTION						RESOLUTION						RESOLUTION
DELTAX	-1					DELTAX	-1				DELTAX	-1					DELTAX	-1				DELTAX	-1							DELTAX	-1					DELTAX	-1					DELTAX	-1
XUNITS	NANOMETERS					XUNITS	NANOMETERS				XUNITS	NANOMETERS					XUNITS	NANOMETERS				XUNITS	NANOMETERS							XUNITS	NANOMETERS					XUNITS	NANOMETERS					XUNITS	NANOMETERS
YUNITS	CD [mdeg]					YUNITS	CD [mdeg]				YUNITS	CD [mdeg]					YUNITS	CD [mdeg]				YUNITS	CD [mdeg]							YUNITS	CD [mdeg]					YUNITS	CD [mdeg]					YUNITS	CD [mdeg]
Y2UNITS	HT [V]					Y2UNITS	HT [V]				Y2UNITS	HT [V]					Y2UNITS	HT [V]				Y2UNITS	HT [V]							Y2UNITS	HT [V]					Y2UNITS	HT [V]					Y2UNITS	HT [V]
Y3UNITS	ABSORBANCE					Y3UNITS	ABSORBANCE				Y3UNITS	ABSORBANCE					Y3UNITS	ABSORBANCE				Y3UNITS	ABSORBANCE							Y3UNITS	ABSORBANCE					Y3UNITS	ABSORBANCE					Y3UNITS	ABSORBANCE
FIRSTX	260					FIRSTX	260				FIRSTX	260					FIRSTX	260				FIRSTX	260							FIRSTX	260					FIRSTX	260					FIRSTX	260
LASTX	190					LASTX	190				LASTX	190					LASTX	190				LASTX	190							LASTX	190					LASTX	190					LASTX	190
NPOINTS	71					NPOINTS	71				NPOINTS	71					NPOINTS	71				NPOINTS	71							NPOINTS	71					NPOINTS	71					NPOINTS	71
FIRSTY	-0.42346					FIRSTY	0.17461				FIRSTY	0.03693					FIRSTY	0.17573				FIRSTY	0.23261							FIRSTY	0.34787					FIRSTY	0.90719					FIRSTY	0.34787
MAXY	20.8366					MAXY	7.93456				MAXY	139.673					MAXY	136.158				MAXY	137.678							MAXY	16.9297					MAXY	19.8592					MAXY	16.9297
MINY	-53.31					MINY	-51.4987				MINY	-100.687					MINY	-104.306				MINY	-103.96							MINY	-128.377					MINY	-132.673					MINY	-128.377
Wavelength				Molar ellipticity		Wavelength					Wavelength				Molar ellipticity		Wavelength					Wavelength					Raw ellipticity	Molar ellipticity		Wavelength				Molar ellipticity		Wavelength						Wavelength
260	-0.423456	238.76	0.00975749	-153.288		260	0.174614	238.954	0.0122353		260	0.0369274	240.387	0.0304965	14.4573		260	0.175732	240.304	0.0294513		260	0.232613	240.596	0.0331538		-0.386529	-151.328		260	0.347874	241.535	0.0450747	136.195		260	0.907188	241.43	0.0437427			260	0.347874
259	-0.412225	239.21	0.0150177	-149.223		259	0.129014	239.048	0.0129572		259	-0.0162574	240.467	0.0310264	-6.36486		259	0.00195321	240.491	0.0313374		259	-0.0142293	240.607	0.0328061		-0.428482	-167.753		259	0.221579	241.487	0.0439802	86.7494		259	0.790046	241.775	0.0476264			259	0.221579
258	-0.418012	239.241	0.0128521	-151.317		258	0.0417283	239.197	0.0122934		258	-0.0588701	240.719	0.0316671	-23.048		258	0.171438	240.937	0.0344408		258	0.306323	240.855	0.0333959		-0.476882	-186.702		258	0.136671	241.765	0.0449326	53.5074		258	0.619572	241.743	0.0446522			258	0.136671
257	-0.51364	239.479	0.00838916	-185.934		257	0.00689886	239.317	0.00632733		257	-0.0570771	241.175	0.0299574	-22.346		257	0.327833	241.216	0.0304737		257	0.0680929	240.972	0.0273818		-0.570717	-223.439		257	-0.0449362	241.897	0.0390959	-17.5928		257	0.521091	242.217	0.0431481			257	-0.0449362
256	-0.173654	239.767	0.00970704	-62.8616		256	0.188222	239.793	0.0100256		256	-0.0115254	241.376	0.0301462	-4.51226		256	-0.0271497	241.223	0.028201		256	0.272337	241.608	0.0330824		-0.185179	-72.4987		256	0.103532	242.12	0.039564	40.5333		256	0.611804	242.475	0.0440364			256	0.103532
255	-0.197477	240.035	0.0124387	-71.4853		255	0.284152	239.805	0.00951609		255	-0.00338698	241.383	0.0295603	-1.32602		255	0.0788768	241.796	0.0347887		255	0.0424203	241.357	0.0292386		-0.200864	-78.6393		255	-0.00752401	242.534	0.0441181	-2.94569		255	0.622683	242.656	0.0456507			255	-0.00752401
254	-0.498865	240.368	0.0131794	-180.586		254	0.119051	240.168	0.0106345		254	-0.0731998	242.284	0.0374574	-28.6581		254	-0.0234789	242.072	0.0347892		254	-0.172666	242.108	0.0352326		-0.572065	-223.966		254	-0.189944	242.701	0.0427298	-74.3641		254	0.50577	243.032	0.0468954			254	-0.189944
253	-0.654139	240.573	0.0109585	-236.794		253	-0.00253763	240.665	0.0121385		253	-0.437075	242.042	0.0295859	-171.117		253	-0.307	242.429	0.034467		253	-0.132925	242.272	0.0324875		-1.09121	-427.216		253	-0.584154	243.349	0.0460622	-228.699		253	0.349859	243.299	0.0454311			253	-0.584154
252	-0.520239	240.842	0.00922619	-188.323		252	0.24704	240.918	0.0101917		252	-0.0279863	242.461	0.0297216	-10.9568		252	-0.284011	242.721	0.0330058		252	-0.195361	242.594	0.0313985		-0.548225	-214.633		252	-0.284127	243.451	0.0421945	-111.237		252	0.372396	243.975	0.0487864			252	-0.284127
251	-0.582174	240.941	0.0083614	-210.743		251	-0.0843177	240.982	0.00888829		251	-0.555005	242.891	0.0330247	-217.287		251	-0.530575	242.86	0.032636		251	-0.651071	243.056	0.0351062		-1.13718	-445.212		251	-0.807144	243.991	0.0468634	-316.001		251	0.0231103	243.697	0.0431767			251	-0.807144
250	-0.598278	241.454	0.00732747	-216.573		250	0.110526	241.467	0.00749167		250	-0.342648	243.219	0.0296181	-134.149		250	-0.445453	243.481	0.0329103		250	-0.478461	243.107	0.0282044		-0.940926	-368.378		250	-0.641578	244.032	0.0398317	-251.181		250	-0.135836	243.9	0.0381756			250	-0.641578
249	-0.750898	241.467	0.00671546	-271.82		249	0.0579278	241.895	0.0121432		249	-0.453494	243.579	0.0333768	-177.545		249	-0.530143	243.514	0.0325626		249	-0.483438	243.452	0.0317782		-1.20439	-471.526		249	-0.975798	244.644	0.0467426	-382.03		249	-0.182768	244.805	0.0487673			249	-0.975798
248	-0.506301	242.069	0.0113652	-183.277		248	0.185196	242.261	0.013783		248	-0.619642	243.956	0.0351357	-242.593		248	-0.923569	244.141	0.0374525		248	-0.762377	243.917	0.0346415		-1.12594	-440.813		248	-1.19692	244.744	0.0450129	-468.601		248	-0.598485	244.768	0.0453178			248	-1.19692
247	-1.18281	242.81	0.0139547	-428.169		247	-0.241449	242.743	0.0131016		247	-1.44717	244.417	0.034152	-566.575		247	-1.52724	244.651	0.0370928		247	-1.2692	244.387	0.0337805		-2.62998	-1029.65		247	-1.94145	245.499	0.0476974	-760.088		247	-1.23164	245.565	0.0485313			247	-1.94145
246	-1.00022	243.048	0.00912297	-362.073		246	-0.485809	243.049	0.00914057		246	-1.58315	244.896	0.0323372	-619.812		246	-1.91557	245.154	0.0355613		246	-1.63464	244.817	0.0313399		-2.58337	-1011.4		246	-2.34783	245.772	0.0432809	-919.188		246	-1.8118	245.86	0.0443818			246	-2.34783
245	-1.22659	243.535	0.0121796	-444.017		245	-0.407692	243.315	0.00940889		245	-2.33041	245.451	0.0361946	-912.368		245	-2.36342	245.423	0.0358464		245	-2.29722	245.361	0.0350716		-3.557	-1392.58		245	-2.88454	246.213	0.045706	-1129.31		245	-2.49402	246.231	0.0459305			245	-2.88454
244	-1.30234	243.821	0.0148155	-471.438		244	-0.658528	243.69	0.0131695		244	-2.92472	245.599	0.0370963	-1145.04		244	-3.15337	245.736	0.0388029		244	-3.31451	245.579	0.0368442		-4.22706	-1654.92		244	-4.2491	246.591	0.0494648	-1663.55		244	-3.58207	247.008	0.0546406			244	-4.2491
243	-1.38404	243.914	0.0113297	-501.013		243	-0.774608	244.089	0.0135238		243	-3.97406	246.044	0.0379899	-1555.87		243	-3.90639	246.111	0.038825		243	-4.10242	245.989	0.0373092		-5.3581	-2097.72		243	-5.33201	246.912	0.0487979	-2087.51		243	-4.68389	247.338	0.0540869			243	-5.33201
242	-1.42942	244.761	0.0145572	-517.44		242	-0.9432	244.576	0.0122382		242	-4.91844	246.539	0.0367662	-1925.6		242	-5.25534	246.259	0.0332751		242	-5.18723	246.472	0.0359248		-6.34786	-2485.22		242	-6.6809	247.868	0.0532737	-2615.61		242	-6.37422	247.785	0.0522452			242	-6.6809
241	-2.08652	245.555	0.0219881	-755.306		241	-1.29781	245.18	0.0172946		241	-6.99551	247.105	0.0413051	-2738.78		241	-7.36646	247.299	0.0437141		241	-7.22121	247.147	0.041826		-9.08203	-3555.66		241	-9.27121	248.787	0.0621395	-3629.73		241	-8.95659	248.72	0.0613234			241	-9.27121
240	-2.56249	245.432	0.0149333	-927.604		240	-1.69642	245.927	0.0211209		240	-8.98725	247.783	0.0442014	-3518.56		240	-9.56686	247.947	0.0462382		240	-9.35603	247.917	0.0458674		-11.5497	-4521.79		240	-12.2324	249.235	0.0621574	-4789.05		240	-11.7971	249.652	0.067306			240	-12.2324
239	-2.61532	246.594	0.0243818	-946.728		239	-1.89657	246.337	0.0211773		239	-11.7508	248.47	0.0476517	-4600.5		239	-12.2226	248.567	0.0488605		239	-12.1198	248.689	0.0503597		-14.3661	-5624.41		239	-15.6234	250.602	0.0739365	-6116.65		239	-15.036	250.624	0.0742143			239	-15.6234
238	-2.89279	247.249	0.0269321	-1047.17		238	-2.40117	247.127	0.025423		238	-14.7595	249.408	0.0536528	-5778.42		238	-15.4175	249.576	0.055723		238	-15.3415	249.401	0.0535705		-17.6523	-6910.97		238	-19.424	251.745	0.0823684	-7604.6		238	-19.2445	251.842	0.0835517			238	-19.424
237	-3.7503	247.659	0.0295211	-1357.58		237	-2.86962	247.771	0.0309098		237	-18.8209	250.388	0.0632171	-7368.48		237	-19.3468	250.575	0.0655217		237	-19.5019	250.598	0.065795		-22.5712	-8836.75		237	-24.0978	252.948	0.0945562	-9434.42		237	-24.3622	253.278	0.0985765			237	-24.0978
236	-4.08458	248.68	0.0330436	-1478.59		236	-3.31755	248.835	0.0349485		236	-23.5459	251.67	0.0698239	-9218.35		236	-24.4388	251.872	0.0722922		236	-24.2822	251.909	0.0727396		-27.6305	-10817.5		236	-30.0523	254.619	0.105743	-11765.6		236	-30.3624	255.084	0.111366			236	-30.0523
235	-4.68104	249.719	0.0429108	-1694.5		235	-4.03929	249.665	0.0422457		235	-28.2054	252.604	0.078286	-11042.6		235	-29.3347	252.611	0.0783699		235	-29.4013	252.877	0.0816157		-32.8864	-12875.2		235	-35.9709	256.388	0.124173	-14082.8		235	-36.6437	256.615	0.126907			235	-35.9709
234	-5.24533	250.635	0.0493119	-1898.77		234	-4.46694	250.987	0.0536319		234	-34.7434	253.908	0.0892858	-13602.2		234	-35.9624	254.294	0.0939799		234	-36.0548	254.446	0.0958221		-39.9887	-15655.8		234	-43.5831	258.668	0.146682	-17063		234	-44.3728	259.043	0.151163			234	-43.5831
233	-6.0239	252.054	0.0566995	-2180.61		233	-4.92167	252.053	0.0566879		233	-41.6008	255.833	0.102622	-16286.9		233	-43.0938	256.093	0.105758		233	-42.8704	255.802	0.102247		-47.6247	-18645.3		233	-52.0647	261.28	0.167813	-20383.6		233	-53.1986	261.59	0.171492			233	-52.0647
232	-6.61306	253.545	0.0647699	-2393.88		232	-5.70467	253.771	0.0675141		232	-49.2967	257.635	0.114186	-19299.9		232	-51.2234	257.715	0.115153		232	-51.2086	257.869	0.116995		-55.9098	-21889		232	-61.6172	264.408	0.194626	-24123.5		232	-62.9584	264.67	0.197705			232	-61.6172
231	-7.0536	255.493	0.0875721	-2553.35		231	-6.01535	255.35	0.0858495		231	-56.9259	259.332	0.13369	-22286.8		231	-58.8684	259.648	0.13746		231	-58.7834	259.797	0.13924		-63.9795	-25048.3		231	-70.5383	267.258	0.227142	-27616.1		231	-72.468	267.945	0.23514			231	-70.5383
230	-7.18813	256.845	0.0949585	-2602.05		230	-6.25324	256.655	0.0926763		230	-63.1563	260.686	0.140909	-24726		230	-65.0144	260.852	0.142886		230	-65.0112	260.938	0.143905		-70.3444	-27540.2		230	-78.1712	269.416	0.243281	-30604.4		230	-79.9988	270.352	0.254085			230	-78.1712
229	-8.17025	258.883	0.109624	-2957.57		229	-6.87355	258.609	0.10635		229	-70.9574	262.663	0.154556	-27780.2		229	-73.5774	263.175	0.1606		229	-73.7659	262.841	0.156658		-79.1277	-30978.9		229	-87.9296	273.283	0.277958	-34424.9		229	-90.0313	274.307	0.289648			229	-87.9296
228	-8.66333	261.263	0.13083	-3136.07		228	-7.64794	261.266	0.130868		228	-78.6739	264.606	0.170293	-30801.3		228	-81.072	265.258	0.177934		228	-81.697	265.009	0.175023		-87.3372	-34193		228	-96.6954	277.193	0.315252	-37856.8		228	-99.183	278.325	0.328016			228	-96.6954
227	-9.03182	264.164	0.151335	-3269.46		227	-7.99351	263.767	0.146664		227	-85.141	267.024	0.184818	-33333.2		227	-87.8665	267.693	0.192604		227	-88.2555	267.508	0.190449		-94.1728	-36869.2		227	-104.503	281.514	0.349993	-40913.5		227	-107.067	282.747	0.363715			227	-104.503
226	-9.5715	266.339	0.165475	-3464.82		226	-8.45914	265.658	0.157519		226	-90.2068	269.104	0.197631	-35316.4		226	-93.1276	269.931	0.207194		226	-93.3358	270.029	0.208323		-99.7783	-39063.7		226	-110.686	285.518	0.383044	-43334.2		226	-113.381	286.699	0.396034			226	-110.686
225	-9.726	268.773	0.181452	-3520.75		225	-8.49115	268.122	0.173894		225	-94.5251	271.653	0.214684	-37007.1		225	-97.4416	272.248	0.221521		225	-97.6177	272.342	0.222593		-104.251	-40814.9		225	-115.785	290.087	0.420724	-45330.4		225	-119.19	291.336	0.434292			225	-115.785
224	-10.1106	271.144	0.196024	-3659.97		224	-9.32866	270.282	0.186097		224	-97.5132	274.168	0.23066	-38176.9		224	-101.113	274.74	0.237183		224	-100.837	274.731	0.237072		-107.624	-42135.3		224	-119.808	294.392	0.454462	-46905.5		224	-123.309	296.351	0.475456			224	-119.808
223	-10.6052	274.113	0.219629	-3839.01		223	-9.56563	273.563	0.213351		223	-99.5115	277.049	0.252954	-38959.3		223	-102.864	277.964	0.263289		223	-102.927	278.048	0.264228		-110.117	-43111.3		223	-122.179	299.592	0.499531	-47833.7		223	-126.043	301.499	0.519674			223	-122.179
222	-10.6938	277.014	0.234823	-3871.08		222	-9.83522	276.509	0.229114		222	-100.687	280.039	0.268863	-39419.5		222	-104.306	281.066	0.280351		222	-103.96	280.667	0.275886		-111.381	-43606.2		222	-123.829	304.768	0.536209	-48479.7		222	-127.432	306.621	0.55551			222	-123.829
221	-11.0979	279.768	0.249112	-4017.36		221	-9.97153	279.047	0.241014		221	-100.137	283.019	0.285377	-39204.2		221	-103.615	283.755	0.293542		221	-103.619	284.102	0.29738		-111.235	-43549.1		221	-123.857	310.016	0.573891	-48490.7		221	-127.431	311.961	0.593862			221	-123.857
220	-11.0505	283.285	0.272297	-4000.21		220	-10.2484	282.217	0.260424		220	-99.6101	286.285	0.305432	-38997.9		220	-102.747	287.46	0.318332		220	-102.974	287.505	0.31883		-110.661	-43324.2		220	-123.363	316.048	0.619436	-48297.3		220	-126.45	317.99	0.639059			220	-123.363
219	-11.6256	286.797	0.293334	-4208.39		219	-10.1732	285.962	0.284156		219	-97.9833	290.136	0.329831	-38361		219	-101.216	290.966	0.338839		219	-101.458	291.13	0.340627		-109.609	-42912.5		219	-122.278	321.908	0.660613	-47872.5		219	-125.095	324.232	0.683719			219	-122.278
218	-11.9543	290.616	0.315575	-4327.37		218	-11.0501	289.356	0.301862		218	-96.3309	293.333	0.344975	-37714.1		218	-99.7643	295.067	0.363613		218	-99.8415	294.969	0.362555		-108.285	-42394.2		218	-119.463	328.352	0.704879	-46770.4		218	-123.113	330.998	0.730744			218	-119.463
217	-12.1974	294.808	0.33659	-4415.37		217	-11.2635	293.768	0.325409		217	-93.3873	298.383	0.37476	-36561.6		217	-96.4834	299.933	0.391199		217	-96.7114	300.009	0.391997		-105.585	-41337		217	-118.322	336.117	0.756059	-46323.7		217	-120.96	339.454	0.788033			217	-118.322
216	-12.8317	298.91	0.363433	-4644.99		216	-11.9003	297.76	0.351213		216	-91.5492	302.519	0.401532	-35842		216	-94.8568	303.839	0.415375		216	-95.2452	304.118	0.418298		-104.381	-40865.7		216	-116.814	343.676	0.811183	-45733.3		216	-119.04	346.451	0.837298			216	-116.814
215	-13.4588	303.172	0.390363	-4871.99		215	-12.6411	301.547	0.373289		215	-90.5334	306.674	0.426915	-35444.3		215	-92.9331	308.328	0.444055		215	-93.0987	308.427	0.445074		-103.992	-40713.5		215	-114.92	350.993	0.861641	-44991.8		215	-118.854	354.093	0.890297			215	-114.92
214	-14.2158	306.774	0.415276	-5146.02		214	-13.539	305.822	0.405378		214	-88.9877	310.61	0.454901	-34839.2		214	-92.0489	313.005	0.479426		214	-92.1564	312.966	0.479029		-103.204	-40404.7		214	-114.416	358.821	0.920925	-44794.5		214	-117.307	362.105	0.950723			214	-114.416
213	-15.8891	312.131	0.451787	-5751.74		213	-13.9689	310.283	0.432826		213	-88.6339	315.686	0.488	-34700.6		213	-91.1269	318.014	0.511527		213	-91.3946	317.771	0.509071		-104.523	-40921.3		213	-114.415	367.665	0.981943	-44794.1		213	-118.34	371.263	1.01392			213	-114.415
212	-16.6533	317.165	0.482674	-6028.38		212	-15.4583	315.856	0.469428		212	-88.5914	321.618	0.527378	-34684		212	-92.032	323.63	0.547405		212	-91.0507	323.65	0.547601		-105.245	-41203.9		212	-116.493	378.434	1.05659	-45607.6		212	-120.35	382.518	1.09201			212	-116.493
211	-18.3985	323.103	0.522644	-6660.13		211	-17.3924	321.433	0.506002		211	-89.447	327.808	0.569143	-35019		211	-92.287	329.805	0.588711		211	-92.636	330.175	0.592323		-107.846	-42222.1		211	-118.172	390.744	1.14285	-46265		211	-122.866	395.41	1.18222			211	-118.172
210	-21.7715	330.044	0.570036	-7881.13		210	-20.1928	327.925	0.549275		210	-91.3596	334.87	0.616887	-35767.8		210	-94.6888	337.713	0.644227		210	-94.4656	337.72	0.644293		-113.131	-44291.4		210	-122.851	405.438	1.2445	-48096.8		210	-127.141	410.341	1.2846			210	-122.851
209	-24.4485	336.926	0.617545	-8850.19		209	-22.7964	334.929	0.598317		209	-92.1447	343.071	0.676096	-36075.1		209	-95.0097	345.842	0.702214		209	-94.2492	346.139	0.705003		-116.593	-45646.9		209	-126.912	421.279	1.35349	-49686.7		209	-132.673	426.919	1.39813			209	-126.912
208	-27.6247	345.78	0.680923	-9999.95		208	-26.0893	343.296	0.657519		208	-89.7971	352.474	0.743308	-35156		208	-94.0511	356.094	0.776625		208	-93.7918	355.626	0.772338		-117.422	-45971.3		208	-128.377	441.134	1.48776	-50260.3		208	-132.478	447.862	1.53894			208	-128.377
207	-30.7497	355.634	0.75119	-11131.2		207	-29.0154	352.81	0.725194		207	-84.94	362.483	0.813534	-33254.5		207	-88.005	366.125	0.846286		207	-87.9371	365.838	0.84372		-115.69	-45293.1		207	-126.987	462.89	1.62974	-49716.1		207	-130.546	470.638	1.68629			207	-126.987
206	-35.6194	366.058	0.823769	-12894		206	-33.2403	362.973	0.796043		206	-75.9005	372.84	0.884048	-29715.5		206	-78.7754	376.838	0.91915		206	-78.1458	376.815	0.918952		-111.52	-43660.6		206	-121.584	487.139	1.78225	-47600.8		206	-123.141	495.374	1.83982			206	-121.584
205	-39.209	379.027	0.916656	-14193.4		205	-36.827	375.469	0.885583		205	-63.9806	384.678	0.96551	-25048.7		205	-64.947	389.374	1.00564		205	-64.5897	389.553	1.00717		-103.19	-40399.3		205	-104.728	515.371	1.95473	-41001.6		205	-110.675	525.121	2.01966			205	-104.728
204	-43.1043	393.833	1.01785	-15603.5		204	-39.6505	389.593	0.981979		204	-45.6166	398.659	1.05829	-17859.1		204	-48.0389	403.681	1.09995		204	-49.5615	403.826	1.10114		-88.7209	-34734.7		204	-93.3109	548.732	2.14723	-36531.7		204	-95.9721	559.576	2.21568			204	-93.3109
203	-45.4188	409.43	1.12072	-16441.3		203	-42.2696	404.613	1.08125		203	-28.506	412.999	1.14971	-11160.3		203	-29.8626	418.793	1.19632		203	-29.9348	418.678	1.1954		-73.9248	-28942		203	-70.7531	583.664	2.33742	-27700.2		203	-74.7369	596.798	2.416			203	-70.7531
202	-50.1866	429.56	1.24128	-18167.2		202	-45.1669	423.844	1.19627		202	-7.39443	431.329	1.25511	-2894.96		202	-8.24287	438.5	1.31067		202	-7.02983	438.488	1.31058		-57.581	-22543.3		202	-49.3116	629.891	2.56741	-19305.8		202	-53.1563	644.805	2.65099			202	-49.3116
201	-51.2841	451.467	1.35898	-18564.5		201	-48.4269	445.641	1.315		201	16.5149	453.14	1.37152	6465.67		201	15.4	460.545	1.42657		201	17.387	460.81	1.42852		-34.7692	-13612.3		201	-19.8666	681.382	2.79898	-7777.88		201	-22.0585	697.997	2.88604			201	-19.8666
200	-53.31	477.672	1.48787	-19297.9		200	-48.8168	471.053	1.44022		200	43.6278	479.383	1.50011	17080.5		200	44.5346	487.701	1.55904		200	47.9732	488.249	1.56289		-9.6822	-3790.63		200	3.48547	740.701	3.03873	1364.58		200	3.46803	758.924	3.12764			200	3.48547
199	-51.4846	508.058	1.61251	-18637.1		199	-51.4987	500.449	1.56048		199	72.7238	510.675	1.63025	28471.8		199	72.7459	520.523	1.69634		199	76.3102	520.635	1.69708		21.2392	8315.26		199	16.0851	802.169	3.24426	6297.4		199	11.167	819.147	3.32174			199	16.0851
198	-49.6787	545.576	1.73581	-17983.3		198	-48.6222	536.907	1.67998		198	107.493	550.615	1.76792	42084.1		198	108.545	561.813	1.83837		198	110.767	562.164	1.84057		57.8143	22634.6		198	16.9297	857.469	3.36768	6628.07		198	5.23923	869.747	3.42075			198	16.9297
197	-48.2556	593.597	1.85268	-17468.2		197	-40.4443	583.274	1.79076		197	139.673	601.376	1.89875	54682.7		197	136.158	614.509	1.97537		197	137.678	614.895	1.9776		91.4174	35790.4		197	14.455	894.268	3.34544	5659.21		197	13.4419	899.74	3.36834			197	14.455
196	-34.7397	662.108	1.9703	-12575.5		196	-31.5335	650.68	1.90784		196	134.854	673.91	2.03384	52796.1		196	121.534	688.802	2.11268		196	117.567	688.741	2.11237		100.114	39195.3		196	6.59043	910.952	3.14329	2580.19		196	19.8592	912.037	3.14777			196	6.59043
195	-8.52381	750.014	2.05114	-3085.56		195	-15.3302	737.795	1.99112		195	83.5619	764.927	2.12326	32714.9		195	79.9933	779.529	2.19272		195	85.0438	779.654	2.19331		75.0381	29377.8		195	-2.5893	914.682	2.7876	-1013.72		195	4.23066	913.919	2.78446			195	-2.5893
194	-6.47316	854.916	1.98617	-2343.24		194	-8.72017	845.668	1.94566		194	41.2749	869.74	2.05032	16159.3		194	27.1925	877.464	2.08337		194	30.8848	876.627	2.07981		34.8017	13625.1		194	2.97188	915.159	2.24119	1163.51		194	3.99532	913.167	2.233			194	2.97188
193	8.24727	923.365	1.4204	2985.46		193	-3.05622	921.576	1.4131		193	5.19479	932.678	1.45824	2033.79		193	18.5245	929.142	1.44391		193	7.27965	927.579	1.43757		13.4421	5262.64		193	-2.37002	915.233	1.38709	-927.876		193	17.4507	913.489	1.37992			193	-2.37002
192	20.8366	935.253	0.432399	7542.71		192	3.22177	935.683	0.434133		192	15.9145	941.551	0.457744	6230.61		192	-5.86603	936.089	0.435771		192	0.126615	934.493	0.429332		36.7511	14388.3		192	4.88244	915.109	0.350337	1911.5		192	13.3438	913.549	0.343915			192	4.88244
191	16.5372	936.372	-0.0231154	5986.35		191	2.28189	936.331	-0.0232807		191	2.60928	939.901	-0.00891193	1021.55		191	3.31487	934.622	-0.0301772		191	2.4938	932.719	-0.0378657		19.1465	7495.95		191	-2.33046	913.857	-0.114842	-912.388		191	8.91982	912.618	-0.119948			191	-2.33046
190	11.4983	933.535	-0.0527935	4162.31		190	7.93456	933.791	-0.0517594		190	7.74349	935.055	-0.0466545	3031.62		190	16.6967	929.623	-0.0686375		190	12.4187	927.913	-0.0755777		19.2418	7533.26		190	-4.4436	911.654	-0.142152	-1739.69		190	-1.06443	909.887	-0.149444			190	-4.4436
##### Extended Information						##### Extended Information					##### Extended Information						##### Extended Information					##### Extended Information								##### Extended Information						##### Extended Information						##### Extended Information
[Comments]						[Comments]					[Comments]						[Comments]					[Comments]								[Comments]						[Comments]						[Comments]
Sample name	Nup358_2147_2240_dot3mgml					Sample name	Nup358_2147_2240_dot3mgml				Sample name	BicD2_715_804_dot3mgml					Sample name	BicD2_715_804_dot3mgml				Sample name	BicD2_715_804_dot3mgml							Sample name	BicD2_715_804_Nup358_2147_2240_dot6mgml					Sample name	BicD2_715_804_Nup358_2147_2240_dot6mgml					Sample name	BicD2_715_804_Nup358_2147_2240_dot6mgml
Comment						Comment					Comment						Comment					Comment								Comment						Comment						Comment
User						User					User						User					User								User						User						User
Division						Division					Division						Division					Division								Division						Division						Division
Company	SUNY Binghamton					Company	SUNY Binghamton				Company	SUNY Binghamton					Company	SUNY Binghamton				Company	SUNY Binghamton							Company	SUNY Binghamton					Company	SUNY Binghamton					Company	SUNY Binghamton
[Detailed Information]						[Detailed Information]					[Detailed Information]						[Detailed Information]					[Detailed Information]								[Detailed Information]						[Detailed Information]						[Detailed Information]
Creation date	2020-01-20 19:01:00					Creation date	2020-01-20 18:46:00				Creation date	2020-01-20 19:16:00					Creation date	2020-01-20 19:30:00				Creation date	2020-01-20 19:45:00							Creation date	2020-01-20 20:00:00					Creation date	2020-01-20 20:16:00					Creation date	2020-01-20 20:00:00
Data array type	Linear data array * 3					Data array type	Linear data array * 3				Data array type	Linear data array * 3					Data array type	Linear data array * 3				Data array type	Linear data array * 3							Data array type	Linear data array * 3					Data array type	Linear data array * 3					Data array type	Linear data array * 3
Horizontal axis	Wavelength [nm]					Horizontal axis	Wavelength [nm]				Horizontal axis	Wavelength [nm]					Horizontal axis	Wavelength [nm]				Horizontal axis	Wavelength [nm]							Horizontal axis	Wavelength [nm]					Horizontal axis	Wavelength [nm]					Horizontal axis	Wavelength [nm]
Vertical axis(1)	CD [mdeg]					Vertical axis(1)	CD [mdeg]				Vertical axis(1)	CD [mdeg]					Vertical axis(1)	CD [mdeg]				Vertical axis(1)	CD [mdeg]							Vertical axis(1)	CD [mdeg]					Vertical axis(1)	CD [mdeg]					Vertical axis(1)	CD [mdeg]
Vertical axis(2)	HT [V]					Vertical axis(2)	HT [V]				Vertical axis(2)	HT [V]					Vertical axis(2)	HT [V]				Vertical axis(2)	HT [V]							Vertical axis(2)	HT [V]					Vertical axis(2)	HT [V]					Vertical axis(2)	HT [V]
Vertical axis(3)	Abs					Vertical axis(3)	Abs				Vertical axis(3)	Abs					Vertical axis(3)	Abs				Vertical axis(3)	Abs							Vertical axis(3)	Abs					Vertical axis(3)	Abs					Vertical axis(3)	Abs
Start	260 nm					Start	260 nm				Start	260 nm					Start	260 nm				Start	260 nm							Start	260 nm					Start	260 nm					Start	260 nm
End	190 nm					End	190 nm				End	190 nm					End	190 nm				End	190 nm							End	190 nm					End	190 nm					End	190 nm
Data interval	1 nm					Data interval	1 nm				Data interval	1 nm					Data interval	1 nm				Data interval	1 nm							Data interval	1 nm					Data interval	1 nm					Data interval	1 nm
Data points	71					Data points	71				Data points	71					Data points	71				Data points	71							Data points	71					Data points	71					Data points	71
[Measurement Information]						[Measurement Information]					[Measurement Information]						[Measurement Information]					[Measurement Information]								[Measurement Information]						[Measurement Information]						[Measurement Information]
Instrument name	J-1100					Instrument name	J-1100				Instrument name	J-1100					Instrument name	J-1100				Instrument name	J-1100							Instrument name	J-1100					Instrument name	J-1100					Instrument name	J-1100
Model name	J-1100					Model name	J-1100				Model name	J-1100					Model name	J-1100				Model name	J-1100							Model name	J-1100					Model name	J-1100					Model name	J-1100
Serial No.	C007061635					Serial No.	C007061635				Serial No.	C007061635					Serial No.	C007061635				Serial No.	C007061635							Serial No.	C007061635					Serial No.	C007061635					Serial No.	C007061635
Detector	PM-539					Detector	PM-539				Detector	PM-539					Detector	PM-539				Detector	PM-539							Detector	PM-539					Detector	PM-539					Detector	PM-539
Lock-in amp.	X mode					Lock-in amp.	X mode				Lock-in amp.	X mode					Lock-in amp.	X mode				Lock-in amp.	X mode							Lock-in amp.	X mode					Lock-in amp.	X mode					Lock-in amp.	X mode
HT volt	Auto					HT volt	Auto				HT volt	Auto					HT volt	Auto				HT volt	Auto							HT volt	Auto					HT volt	Auto					HT volt	Auto
Accessory	PTC-514					Accessory	PTC-514				Accessory	PTC-514					Accessory	PTC-514				Accessory	PTC-514							Accessory	PTC-514					Accessory	PTC-514					Accessory	PTC-514
Accessory S/N	B005961648					Accessory S/N	B005961648				Accessory S/N	B005961648					Accessory S/N	B005961648				Accessory S/N	B005961648							Accessory S/N	B005961648					Accessory S/N	B005961648					Accessory S/N	B005961648
Temperature	21.88 C					Temperature	21.79 C				Temperature	21.93 C					Temperature	21.90 C				Temperature	21.84 C							Temperature	21.89 C					Temperature	21.92 C					Temperature	21.89 C
Control sensor	Holder					Control sensor	Holder				Control sensor	Holder					Control sensor	Holder				Control sensor	Holder							Control sensor	Holder					Control sensor	Holder					Control sensor	Holder
Monitor sensor	Cell					Monitor sensor	Cell				Monitor sensor	Cell					Monitor sensor	Cell				Monitor sensor	Cell							Monitor sensor	Cell					Monitor sensor	Cell					Monitor sensor	Cell
Start Mode	Keep target temperature +/-0.10 deg C while 5 seconds					Start Mode	Keep target temperature +/-0.10 deg C while 5 seconds				Start Mode	Keep target temperature +/-0.10 deg C while 5 seconds					Start Mode	Keep target temperature +/-0.10 deg C while 5 seconds				Start Mode	Keep target temperature +/-0.10 deg C while 5 seconds							Start Mode	Keep target temperature +/-0.10 deg C while 5 seconds					Start Mode	Keep target temperature +/-0.10 deg C while 5 seconds					Start Mode	Keep target temperature +/-0.10 deg C while 5 seconds
Measurement date	2020-01-20 19:01:00					Measurement date	2020-01-20 18:46:00				Measurement date	2020-01-20 19:16:00					Measurement date	2020-01-20 19:30:00				Measurement date	2020-01-20 19:45:00							Measurement date	2020-01-20 20:00:00					Measurement date	2020-01-20 20:16:00					Measurement date	2020-01-20 20:00:00
CD Overload detect	62					CD Overload detect	62				CD Overload detect	63					CD Overload detect	62				CD Overload detect	62							CD Overload detect	56					CD Overload detect	56					CD Overload detect	56
Photometric mode	CD	HT	Abs			Photometric mode	CD	HT	Abs		Photometric mode	CD	HT	Abs			Photometric mode	CD	HT	Abs		Photometric mode	CD	HT	Abs					Photometric mode	CD	HT	Abs			Photometric mode	CD	HT	Abs			Photometric mode	CD
Measure range	260 - 190 nm					Measure range	260 - 190 nm				Measure range	260 - 190 nm					Measure range	260 - 190 nm				Measure range	260 - 190 nm							Measure range	260 - 190 nm					Measure range	260 - 190 nm					Measure range	260 - 190 nm
Data pitch	1 nm					Data pitch	1 nm				Data pitch	1 nm					Data pitch	1 nm				Data pitch	1 nm							Data pitch	1 nm					Data pitch	1 nm					Data pitch	1 nm
CD scale	200 mdeg/1.0 dOD					CD scale	200 mdeg/1.0 dOD				CD scale	200 mdeg/1.0 dOD					CD scale	200 mdeg/1.0 dOD				CD scale	200 mdeg/1.0 dOD							CD scale	200 mdeg/1.0 dOD					CD scale	200 mdeg/1.0 dOD					CD scale	200 mdeg/1.0 dOD
FL scale	200 mdeg/1.0 dOD					FL scale	200 mdeg/1.0 dOD				FL scale	200 mdeg/1.0 dOD					FL scale	200 mdeg/1.0 dOD				FL scale	200 mdeg/1.0 dOD							FL scale	200 mdeg/1.0 dOD					FL scale	200 mdeg/1.0 dOD					FL scale	200 mdeg/1.0 dOD
D.I.T.	1 sec					D.I.T.	1 sec				D.I.T.	1 sec					D.I.T.	1 sec				D.I.T.	1 sec							D.I.T.	1 sec					D.I.T.	1 sec					D.I.T.	1 sec
Bandwidth	1.00 nm					Bandwidth	1.00 nm				Bandwidth	1.00 nm					Bandwidth	1.00 nm				Bandwidth	1.00 nm							Bandwidth	1.00 nm					Bandwidth	1.00 nm					Bandwidth	1.00 nm
Start mode	Immediately					Start mode	Immediately				Start mode	Immediately					Start mode	Immediately				Start mode	Immediately							Start mode	Immediately					Start mode	Immediately					Start mode	Immediately
Scanning mode	Continuous					Scanning mode	Continuous				Scanning mode	Continuous					Scanning mode	Continuous				Scanning mode	Continuous							Scanning mode	Continuous					Scanning mode	Continuous					Scanning mode	Continuous
Scanning speed	20 nm/min					Scanning speed	20 nm/min				Scanning speed	20 nm/min					Scanning speed	20 nm/min				Scanning speed	20 nm/min							Scanning speed	20 nm/min					Scanning speed	20 nm/min					Scanning speed	20 nm/min
Baseline correction	Baseline					Baseline correction	Baseline				Baseline correction	Baseline					Baseline correction	Baseline				Baseline correction	Baseline							Baseline correction	Baseline					Baseline correction	Baseline					Baseline correction	Baseline
Shutter control	Auto					Shutter control	Auto				Shutter control	Auto					Shutter control	Auto				Shutter control	Auto							Shutter control	Auto					Shutter control	Auto					Shutter control	Auto
Accumulations	3					Accumulations	3				Accumulations	3					Accumulations	3				Accumulations	3							Accumulations	3					Accumulations	3					Accumulations	3
N2 Flowmeter	Manual					N2 Flowmeter	Manual				N2 Flowmeter	Manual					N2 Flowmeter	Manual				N2 Flowmeter	Manual							N2 Flowmeter	Manual					N2 Flowmeter	Manual					N2 Flowmeter	Manual
