# Supplementary material for: Coil-to-α-helix transition at the Nup358-BicD2 interface activates BicD2 for dynein recruitment
Source: eLife. 2022 Mar 1;11:e74714. doi: 10.7554/eLife.74714 (PMC8956292; doi:10.7554/eLife.74714)
Supplement: Figure 8—source data 1. [file elife-74714-fig8-data1.xlsx]

## Sheet: Sheet1
	DDBNmin-zip (events/min/µm MT)	events/min//µm MT	events/min//µm MT				L2167A ( (events/min/µm MT))				M2173A (events/min/µm MT)			L2177A (events/min/µm MT)					F2180A (events/min/µm MT)				L2184A (events/min/µm MT)
	0.071599	0.0884956	0.1111				0				0.051			0.0784683	0.0633955	0.0838504			0				0.0401
	0.0845547	0.116618	0.0563				0				0.0318			0.0591296	0.0590563	0.0469594			0.1137				0.0638
	0.0509295	0.135135	0.0881				0.0634				0			0.071495	0.0498927	0.0842531			0				0.0232
	0.0747105	0.0505306	0.1026				0				0.0445			0.0448149	0.0611471	0.0651933			0.0329				0.054
	0.0539084	0.103413	0.1303				0				0.0939			0.0582886	0.0588339	0.11439			0.0923				0.0389
	0.0809061	0.065083	0.0846				0				0.0732			0.0818532	0.0527398	0.10367			0.0655				0.044
	0.0998502	0.0457666	0.0778				0.0642				0.0776			0.0407681	0.0943931	0.0671727			0				0.0437
	0.0905797	0.0475285	0.0748				0				0.04			0.0418989	0.0687474	0.073888			0.0672				0.056
	0.0724638	0.0875657	0.1136				0				0.0462			0.0611396	0.0576868	0.0955247			0.0847				0.0624
	0.0847458	0.0286615	0.0778				0				0.0796			0.0349944	0.0853097	0.0590807			0.0784				0.1081
	0.127226	0.0559754	0.2312				0				0.0766			0.0576236	0.105241	0.0565451			0.0825				0.0606
	0.098668	0.0344353	0.1412				0.0829				0.0491			0.0451732	0.160888	0.0720617			0				0
	0.0839983	0.0295596	0.1446				0				0.0455			0.033437	0.0566669	0.114639			0.0464				0.0684
	0.0994036	0.0436586	0.0751				0				0.0752			0.0509554	0.103831	0.110877			0				0.0465
	0.0698812	0.0278474	0.0816				0				0.067			0.0784683	0.0932749				0.0464				0
	0.0606428	0.0616523	0.0614				0				0.0403			0.0591296	0.0930233				0.0646				0.058
	0.0773994	0.0498008	0.0437				0.0519				0.0737			0.071495					0.0234				0.0249
	0.0703235	0.0533618	0.0803				0				0.0444			0.0726533					0.0843				0.0341
	0.068918	0.0475511	0.1208				0				0.0657			0.0582886					0				0.0482
	0.0905387	0.0402901	0.0839				0				0.0384			0.0818532					0				0
	0.0765404	0.0897666	0.107				0.1029				0.043			0.0407681					0.0552				0.0469
	0.114416	0.0576701	0.1497				0				0.0518			0.050449					0				0.0476
	0.140056		0.0458				0				0.0515			0.0611396					0.0583				0.0403
			0.0971				0.0623				0.0461			0.056205					0.0614				0.1097
			0.0313				0				0.0551			0.0566604					0.0677				0
			0.0779				0.0441				0.035			0.0776337					0.0621				0.0604
			0.0917				0.0391				0.0315			0.0412575					0.063				0.0655
			0.0843				0				0.0459			0.0547166					0.0577				0.0363
			0.0842				0				0.0705			0.051709					0.0648				0.0655
			0.1223				0.0806				0.0483			0.0637308					0				0.0807
			0.0823								0.0398			0.0543095					0
			0.0727																0.0836
																			0
