# Supplementary material for: Coil-to-α-helix transition at the Nup358-BicD2 interface activates BicD2 for dynein recruitment
Source: eLife. 2022 Mar 1;11:e74714. doi: 10.7554/eLife.74714 (PMC8956292; doi:10.7554/eLife.74714)
Supplement: Figure 8—source data 2. [file elife-74714-fig8-data2.xlsx]

## Sheet: Sheet1
	WT-DDBN (% )	WT-BN (%)	I2167-DDBN (% )	I2167-BN (%)	M2173-DDBN (%)	M2173-BN (%)	L2177A-DDBN (%)	L2177A-BN (% )	F2180A-DDBN(%)	F2180A-BN(%)	L2184A-DDBN (%)	L2184A-BN (%)
	37.9747	15.625	7.2165	3.8052	19.6078	5.9273	19.91	8.5603	17.8571	3.7037	17.757	5.7692
	35.7798	16.6667	4.4554	4.1237	19.8198	4.6218	23.84	12.4352	20.9302	14.6552	14.2857	6.8627
	31.0345	10.9677	5.2083		19.403	5.868			13.7931	15.942	19.3548
	--		--		--	5.7569			--	7.6087	--
Mean	34.9297	14.4198	5.6268	3.9644	19.6102	5.5435	21.875	10.4978	17.5268	10.4774	17.1325	6.316
SEM	1.4482	1.2389	0.5827	0.092	0.0851	0.2395	1.965	1.9375	1.4615	2.252	1.058	0.3157
