# Supplementary material for: Coil-to-α-helix transition at the Nup358-BicD2 interface activates BicD2 for dynein recruitment
Source: eLife. 2022 Mar 1;11:e74714. doi: 10.7554/eLife.74714 (PMC8956292; doi:10.7554/eLife.74714)
Supplement: Figure 8—source data 3. [file elife-74714-fig8-data3.xlsx]

## Sheet: Sheet1
DDBNmin-zip (µm/s)	M2173A (µm/s)	L2177A( µm/s)	F2180A ( µm/s)	L2184A (µm/s)
0.3305	0.159	0.338	0.1249	0.17
0.4328	0.351	0.186	0.1117	0.117
0.484	0.284	0.149	0.591	0.165
0.256	0.311	0.650313	0.09	0.144
0.2371	0.116	0.396	0.091	0.06
0.5401	0.365	0.196	0.077	0.042
0.1591	0.12	0.316	0.169	0.166
0.2128	0.288	0.192	0.249	0.173
0.1218	0.121	0.541667	0.221	0.071
0.1153	0.095	0.276	0.472	0.137
0.4859	0.19	0.409	0.144	0.272
0.4114	0.222	0.234569	0.101	0.126
0.7087	0.333	0.649833	0.205	0.122
0.1396	0.386	0.135	0.173	0.09
0.9619	0.201	0.64	0.411	0.357
0.427	0.119	0.503	0.241	0.025
0.147	0.156	0.171	0.07	0.4375
0.3603	0.106	0.068	0.104	0.1626
0.3552	0.096	0.142	0.068	0.3672
0.1448	0.328	0.131	0.242	0.066
0.0809	0.17	0.857	0.557	0.054
0.1131	0.177	0.294	0.026	0.051
0.0638	0.102	0.969	0.101	0.164
0.3274	0.606	0.069	0.225	0.206
0.0508	0.547	0.065	0.276	0.153
0.3868	0.367	0.467	0.2987	0.197
0.3872	0.206	0.546	0.2229	0.114
0.1713	0.156	0.392	0.2713	0.106
0.4237	0.097	0.391	0.333	0.132
0.2929	0.152	0.826	0.13	0.058
0.1042	0.49	0.425	0.051	0.344
0.11	0.141	0.174	0.086	0.63
0.1233	0.19	0.139	0.1622	0.32
0.3059	0.33	0.107	0.455	0.212
0.5276	0.289	0.316	0.179	0.405
0.153	0.309	0.450862	0.099	0.163
0.131	0.217	0.148	0.634	0.251
0.1979	0.299	0.157	0.733	0.3245
0.0826	0.207	0.126	0.368	0.243
0.5446	0.303	0.088	0.618	0.3252
0.0768	0.467	0.107	0.437	0.351
0.5335	0.21	0.386	0.353
0.4216	0.147	0.232	0.211
0.1773	0.171	0.119	0.359
0.1818	0.12	1.00954	0.199
0.148	0.16	0.101	0.234
0.4095	0.071	0.167	0.273
0.2431	0.1	0.213	0.24
0.3199	0.127	0.097	0.328
0.1441	0.109	0.191	0.3035
0.3582	0.119	0.103	0.171
0.5148	0.133	0.376	0.1868
0.3983	0.193	0.187	0.143
0.4925	0.354	0.127	0.2526
0.3033	0.2799	0.134
0.295	0.494	0.6535
0.0803	0.1955	0.132
0.377	0.178	0.122
0.3716		0.113
0.1897		0.166
0.2446		0.255
0.5499		0.734091
0.351		0.163
0.426		0.202
0.1203		0.137
0.8476		0.237
0.4185		0.174
0.231		0.109
0.6798		0.217
0.2091		0.417
0.501		0.109
0.824		0.295
0.6159		0.236
0.372		0.474
0.2587		0.292
0.351		0.384
0.5695		0.336
0.315		0.794
0.592		0.3
0.689		0.514
0.309		0.49
0.661		0.513
0.754		0.559
1.285		0.479
0.642		0.266
0.377		0.533
0.638
0.576
0.454
0.598
0.696
0.526
0.351
0.742
0.959
0.55
1.148
0.261
0.601
0.84
0.16
0.827
0.661
0.694
0.392
0.769
0.276
0.826
0.611
0.353
0.482
0.477
0.478
0.886
0.235
0.333
0.216
0.595
1.3038
0.115
0.47
0.127
0.245
