# Supplementary material for: Coil-to-α-helix transition at the Nup358-BicD2 interface activates BicD2 for dynein recruitment
Source: eLife. 2022 Mar 1;11:e74714. doi: 10.7554/eLife.74714 (PMC8956292; doi:10.7554/eLife.74714)
Supplement: Figure 8—source data 4. [file elife-74714-fig8-data4.xlsx]

## Sheet: Sheet1
WT (µm)	M2173A (µm)	L2177A (µm)	F2180A (µm)	L2184A (µm)
4.97866	2.194	4.666	1.074	3.955
3.88886	7.799	2.57	1.117	1.146
3.1498	3.69	4.303	1.821	2.498
1.61741	0.657	2.081	0.591	1.672
2.70503	3.176	4.275	1.221	1.476
1.36004	2.773	2.777	0.973	0.953
4.06898	3.275	1.993	1.718	3.227
1.06974	2.359	2.261	1.148	2.494
4.99219	1.309	1.625	1.774	0.939
2.79276	1.214	4.638	1.116	1.401
1.15424	1.295	1.145	1.831	1.76
3.84299	1.067	2.721	4.6	1.029
5.20351	3.601	3.899	2.354	0.953
5.80111	1.931	1.913	3.554	1.029
6.17984	1.324	1.152	2.227	1.712
1.21669	1.761	2.515	2.214	0.855
1.89255	2.21	2.876	3.002	1.05
2.46479	3.322	1.098	1.539	0.553
2.00406	2.357	2.355	1.868	1.322
4.06022	1.1	0.784	3.041	1.343
0.924595	1.566	0.857	2.794	1.849
1.16042	1.342	3.117	1.594	0.84
2.32307	3.282	0.969	1.114	2.235
3.8019	3.999	1.304	1.767	2.717
1.271	1.369	0.599	1.431	2.883
1.05436	1.15	2.986	2.08	2.802
1.77156	3.178	7.323	1.292	4.59
8.13721	2.336	8.306	3.082	5.394
1.87403	1.266	12.345	3.869	2.566
2.50867	2.376	8.751	0.828	1.635
1.16069	0.865	5.691	2.27	4.158
2.47938	0.934	4.062	0.847	2.917
1.57201	2.125	3.28	2.442	1.483
2.01854	2.51	3.664	2.199	1.629
1.1724	1.33	2.615	2.263	2.001
2.72299	1.095	6.668	2.281	4.615
1.76669	2.475	2.286	1.171	2.049
2.66748	0.723	4.401	1.233	2.561
1.93915	1.161	3.645	3.366	1.72
2.72977	1.092	2.45	3.145	2.304
1.12726	1.134	3.476	2.365	2.745
2.63446	0.8	3.9	5.958
5.65053	1.203	2.456	1.32
2.23685	0.648	2.221	2.43
2.94325	1.368	9.214	0.99
4.4997	0.927	2.074	1.399
1.14615	1.249	2.554	0.99
1.1325	1.346	2.902	2.574
2.23049	1.926	1.186	2.94
2.95492	2.317	1.094	2.065
1.85594	1.9	1.955	1.017
1.23904	1.996	3.816	1.558
1.80492	1.2	1.796	0.91
1.80184	1.984	2.338	1.195
0.743263	2.799	1.307
0.682945	0.987	1.922
1.95671	2.971	1.861
1.09975	1.142	9.059
2.03092		1.727
1.82834		3.826
5.34162		1.615
9.61073		2.807
5.12764		1.817
8.86758		2.331
2.98182		2.559
3.93225		2.015
3.53078		0.914
5.10841		1.737
9.73		8.518
2.007		1.086
4.989		4.608
1.863		1.51
2.988		3.414
2.529		2.805
5.785		3.685
6.366		2.625
2.854		1.27
5.328		1.562
6.275		1.954
14.877		4.215
10.004		4.006
19.294		12.31
6.784		1.723
10.285		4.012
14.788		1.6
8.894
12.891
2.763
4.362
11.716
6.401
5.574
3.231
6.528
12.85
9.343
6.429
4.962
8.607
6.382
1.729
5.953
5.681
10.269
5.567
4.305
2.814
3.138
9.168
3.675
3.854
17.94
16.686
6.834
2.304
3.859
2.33
1.547
5.476
2.95
3.851
1.757
2.45
